# Supplementary material for: The Idd4 Locus Displays Sex-Specific Epistatic Effects on Type 1 Diabetes Susceptibility in Nonobese Diabetic Mice
Source: Oxford University Press journal article supplement (doi:10.2337/db06-0758), 2006-11-28
Supplement: pg3611table3.xls [file pg3611table3.xls]

## Sheet: BroadMit_snps_C57BLKS_J_data_ad
Supplementary Table 3.
SNP ID	POSITION	B6	NOD	DBA	C57BLKS/J	COMPARISON
D11Jyh598	72593878	-	-	-	-	Danska Marker
11-72607097	72607097	C	C	G	G	B6_EQ_NOD_NEQ_DBA
11-72631853	72631853	A	A	G	G	B6_EQ_NOD_NEQ_DBA
D11Jyh608	72646938	-	-	-	-	Danska Marker
11-72653802	72653802	C	C	T	T	B6_EQ_NOD_NEQ_DBA
11-72663821	72663821	G	G	C	C	B6_EQ_NOD_NEQ_DBA
11-72666255	72666255	G	G	A	A	B6_EQ_NOD_NEQ_DBA
11-72682579	72682579	T	T	A	A	B6_EQ_NOD_NEQ_DBA
11-72682604	72682604	A	A	C	C	B6_EQ_NOD_NEQ_DBA
11-72696950	72696950	T	T	G	G	B6_EQ_NOD_NEQ_DBA
11-72697041	72697041	C	C	T	T	B6_EQ_NOD_NEQ_DBA
11-72705461	72705461	G	G	C	C	B6_EQ_NOD_NEQ_DBA
11-72705486	72705486	G	G	A	A	B6_EQ_NOD_NEQ_DBA
11-72742944	72742944	C	C	T	T	B6_EQ_NOD_NEQ_DBA
11-72782923	72782923	G	G	A	A	B6_EQ_NOD_NEQ_DBA
11-72787486	72787486	C	C	C	C	ALLEQUAL
11-72799372	72799372	C	C	C	C	ALLEQUAL
11-72801438	72801438	G	G	G	G	ALLEQUAL
11-72814504	72814504	A	A	A	A	ALLEQUAL
11-72814789	72814789	G	G	G	G	ALLEQUAL
11-72818797	72818797	T	T	T	T	ALLEQUAL
11-72820584	72820584	C	C	C	C	ALLEQUAL
11-72848794	72848794	A	C	A	A	B6_EQ_DBA_NEQ_NOD
11-72850441	72850441	G	G	G	G	ALLEQUAL
D11Jyh629	72858116	-	-	-	-	Danska Marker
11-72863183	72863183	C	C	C	C	ALLEQUAL
11-72869424	72869424	C	T	C	C	B6_EQ_DBA_NEQ_NOD
11-72869850	72869850	T	T	T	T	ALLEQUAL
11-72879735	72879735	A	G	G	G	NOD_EQ_DBA_NEQ_B6
11-72879792	72879792	C	T	T	T	NOD_EQ_DBA_NEQ_B6
11-72885496	72885496	G	G	G	G	ALLEQUAL
11-72934742	72934742	G	T	T	T	NOD_EQ_DBA_NEQ_B6
11-72949272	72949272	C	C	C	C	ALLEQUAL
11-73001651	73001651	T	T	T	T	ALLEQUAL
11-73002280	73002280	C	C	C	C	ALLEQUAL
11-73007364	73007364	A	A	A	A	ALLEQUAL
11-73007527	73007527	G	G	G	G	ALLEQUAL
11-73010962	73010962	T	T	T	T	ALLEQUAL
11-73023384	73023384	A	A	A	A	ALLEQUAL
11-73039129	73039129	G	G	G	G	ALLEQUAL
11-73039915	73039915	T	T	T	T	ALLEQUAL
11-73105205	73105205	A	A	A	A	ALLEQUAL
11-73129760	73129760	C	C	C	C	ALLEQUAL
11-73133670	73133670	A	A	A	A	ALLEQUAL
11-73134627	73134627	C	C	C	C	ALLEQUAL
11-73152302	73152302	A	A	A	A	ALLEQUAL
11-73152417	73152417	C	C	C	C	ALLEQUAL
11-73152534	73152534	C	C	C	C	ALLEQUAL
11-73193515	73193515	T	T	T	T	ALLEQUAL
11-73244769	73244769	C	C	C	C	ALLEQUAL
11-73250870	73250870	T	T	T	T	ALLEQUAL
11-73274543	73274543	G	G	G	G	ALLEQUAL
11-73302086	73302086	G	G	G	G	ALLEQUAL
11-73326061	73326061	T	T	T	N	ALLEQUAL
11-73330641	73330641	C	C	C	C	ALLEQUAL
11-73338930	73338930	C	C	C	C	ALLEQUAL
11-73339397	73339397	T	T	T	T	ALLEQUAL
11-73340913	73340913	T	T	T	T	ALLEQUAL
11-73357830	73357830	A	A	A	A	ALLEQUAL
11-73375203	73375203	A	A	A	A	ALLEQUAL
11-73380655	73380655	G	G	G	G	ALLEQUAL
11-73385075	73385075	C	C	C	C	ALLEQUAL
11-73397685	73397685	T	A	A	A	NOD_EQ_DBA_NEQ_B6
11-73408936	73408936	A	A	A	A	ALLEQUAL
11-73418576	73418576	G	G	G	G	ALLEQUAL
11-73448389	73448389	T	T	T	T	ALLEQUAL
11-73459270	73459270	G	G	G	G	ALLEQUAL
11-73496669	73496669	C	C	C	C	ALLEQUAL
11-73511799	73511799	T	T	T	T	ALLEQUAL
11-73521917	73521917	C	C	C	C	ALLEQUAL
11-73537419	73537419	G	G	G	G	ALLEQUAL
11-73538243	73538243	C	C	C	C	ALLEQUAL
11-73549358	73549358	G	G	G	G	ALLEQUAL
11-73576083	73576083	C	C	C	C	ALLEQUAL
11-73578801	73578801	T	T	T	T	ALLEQUAL
11-73583548	73583548	A	A	A	A	ALLEQUAL
11-73670926	73670926	A	A	A	A	ALLEQUAL
11-73696309	73696309	G	G	G	G	ALLEQUAL
11-73722822	73722822	C	T	T	T	NOD_EQ_DBA_NEQ_B6
11-73740875	73740875	A	G	G	G	NOD_EQ_DBA_NEQ_B6
11-73810395	73810395	G	G	G	G	ALLEQUAL
11-73815887	73815887	A	A	A	N	ALLEQUAL
11-73816498	73816498	T	T	T	T	ALLEQUAL
11-73818664	73818664	G	G	G	G	ALLEQUAL
11-73823803	73823803	G	G	G	G	ALLEQUAL
11-73850854	73850854	T	T	T	T	ALLEQUAL
11-73850924	73850924	G	G	G	G	ALLEQUAL
11-73851698	73851698	G	A	A	A	NOD_EQ_DBA_NEQ_B6
D11Jyh306	73875420	-	-	-	-	Danska Marker
